# Supplementary material for: Poly[N-(2-hydroxypropyl)methacrylamide] nanogels by RAFT polymerization in inverse emulsion
Source: Royal Society of Chemistry journal article supplement (doi:10.1039/c3py01280h), 2013-10-15
Supplement: c3py01280h.pdf [file c3py01280h.pdf]

## **ELECTRONIC SUPPLEMENTARY INFORMATION FOR:**

### **Poly[*N*-(2-Hydroxypropyl)Methacrylamide] Nanogels**

### **by RAFT Polymerization in Inverse Emulsion**

Harald Wutzel,<sup>a,b</sup> Felix H. Richter,<sup>a</sup> Yuanchao Li,<sup>c</sup> Sergei S. Sheiko<sup>c</sup> and Harm-Anton Klok\*<sup>a</sup>

<sup>a</sup> *École Polytechnique Fédérale de Lausanne (EPFL), Institut des Matériaux and Institut des Sciences et Ingénierie Chimiques, Laboratoire des Polymères, Bâtiment MXD, Station 12,*

*CH-1015 Lausanne, Switzerland*

*Fax: + 41 21 693 5650; Tel: + 41 21 693 44866; E-mail: harm-anton.klok@epfl.ch*

<sup>b</sup> *Present address: Chalmers University of Technology, Department of Chemical and Biological Engineering, Polymer Technology, SE-412 96 Gothenburg, Sweden. Fax: + 46*

*31772 8229; Tel: + 46 31772 10 00; E-mail: wutzel@chalmers.se*

<sup>c</sup> *Department of Chemistry, University of North Carolina, Chapel Hill, North Carolina,*

*27599-3290, USA . Fax: +1 919 962 2388; Tel: +1 919 843 5270; E-mail:*

*sergei@email.unc.edu*

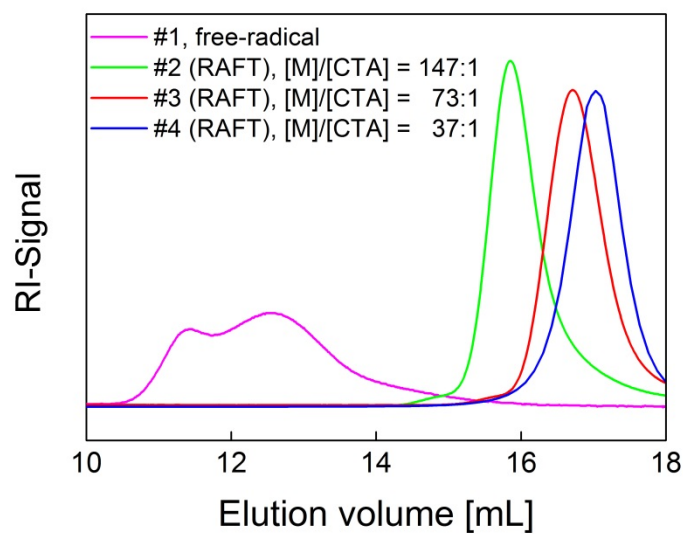

**Figure S1:** SEC-traces (RI-signal) of polymers prepared in experiments # 1 - # 4 ( $c_{\text{HPMA}} = 2.3\text{M}$ , solvent:  $\text{H}_2\text{O}/\text{MeOH}$ ,  $T = 80\text{ }^\circ\text{C}$ ,  $t = 4\text{ h}$ ).

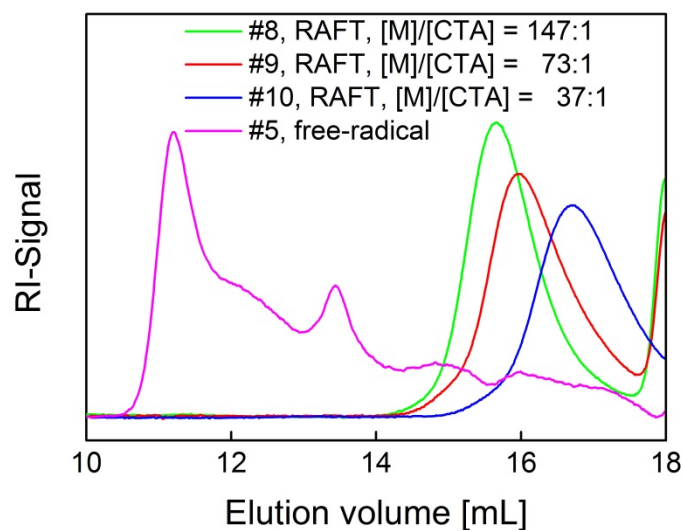

**Figure S2:** SEC-traces (RI-signal) of polymers prepared in experiments # 5, # 8, # 9 and # 10 ( $c_{\text{HPMA,H}_2\text{O}} = 2.3\text{M}$ , surfactant: HM 1083, solvent:  $\text{H}_2\text{O}/\text{MeOH}$  and cyclohexane,  $T = 80\text{ }^\circ\text{C}$ ,  $t = 2\text{ h}$ ).

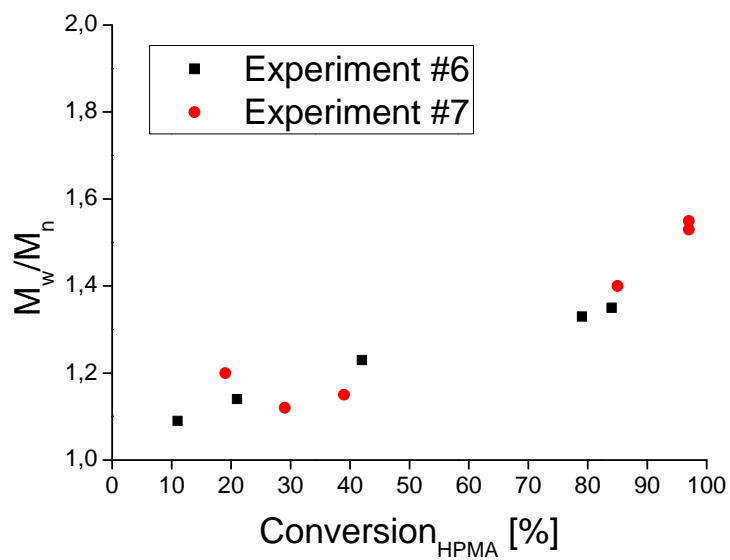

**Figure S3.** Evolution of  $M_w/M_n$  (derived from SEC) with HPMA conversion in the inverse RAFT emulsion polymerization experiments # 6 and # 7.

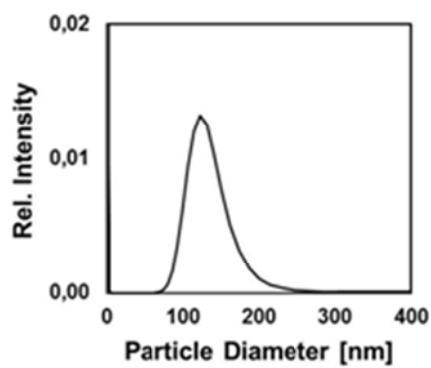

**Figure S4:** DLS particle size distribution of PHPMA nanoparticles from experiment # 13 directly after dissolution in EtOH.
